# Supplementary material for: Revealing the Tick Microbiome: Insights into Midgut and Salivary Gland Microbiota of Female Ixodes ricinus Ticks
Source: MDPI journal article supplement (doi:10.3390/ijms24021100), 2023-01-06
Supplement: s1 [file s1]

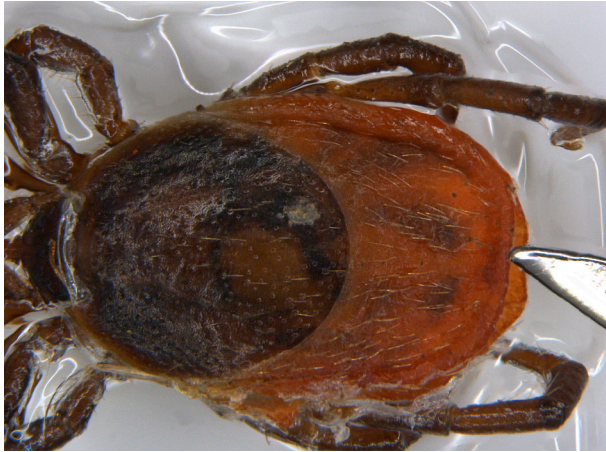

Figure S1: *I. ricinus* tick (fixed on a microscope slide; 30× magnification).

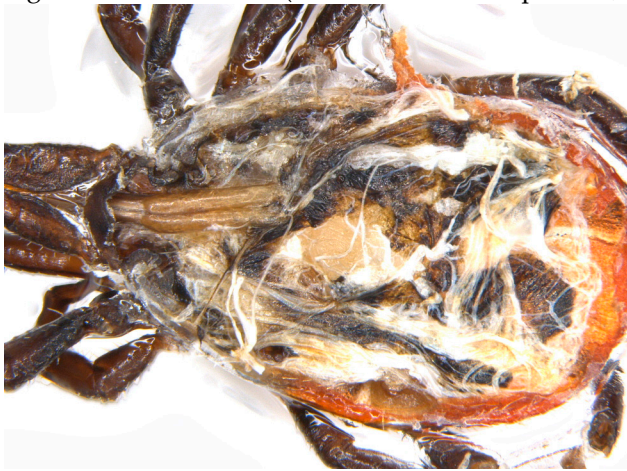

Figure S2: *I. ricinus* tick after removing the scutum (fixed on a microscope slide; 30× magnification).

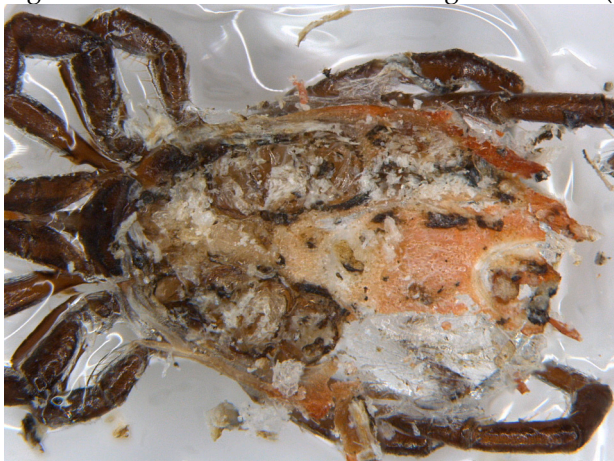

Figure S3: *I. ricinus* tick after removing midgut and salivary glands (fixed on a microscope slide; 30× magnification).

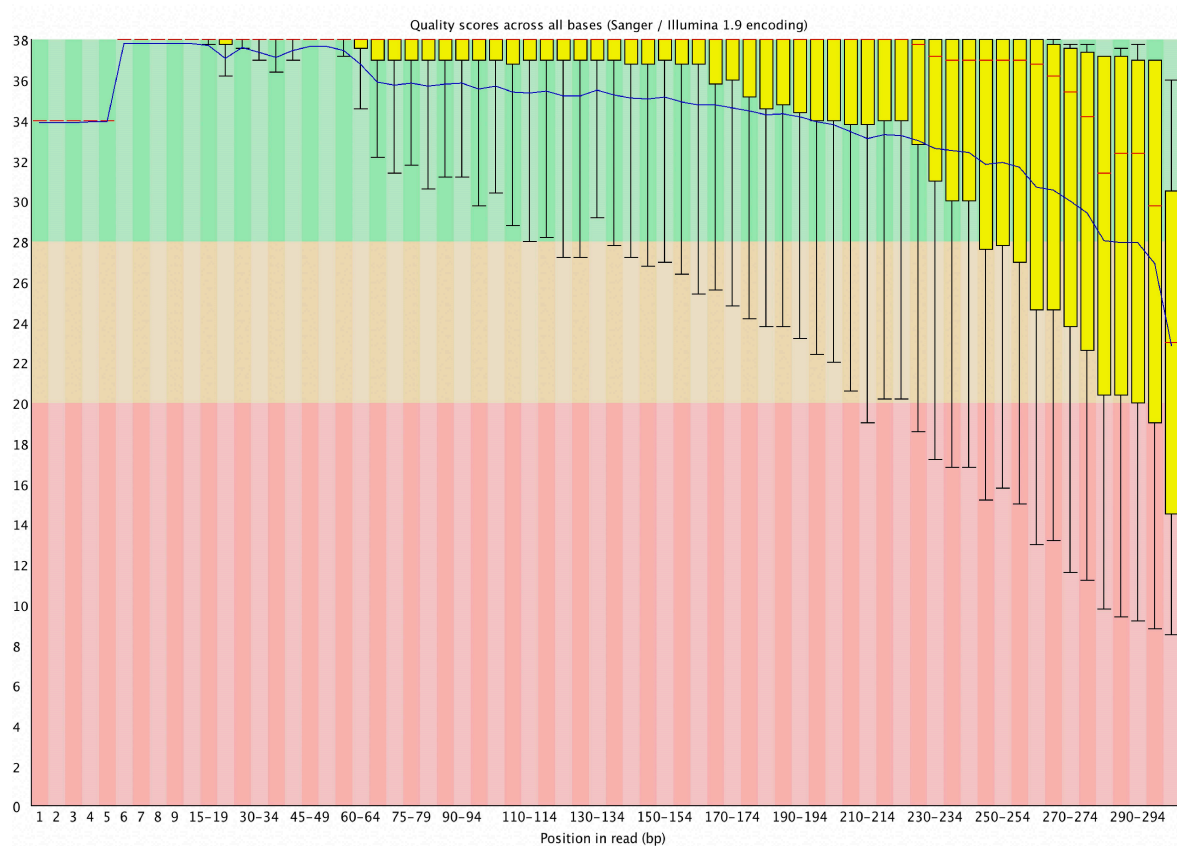

Figure S4: Sequence quality per base for R1.

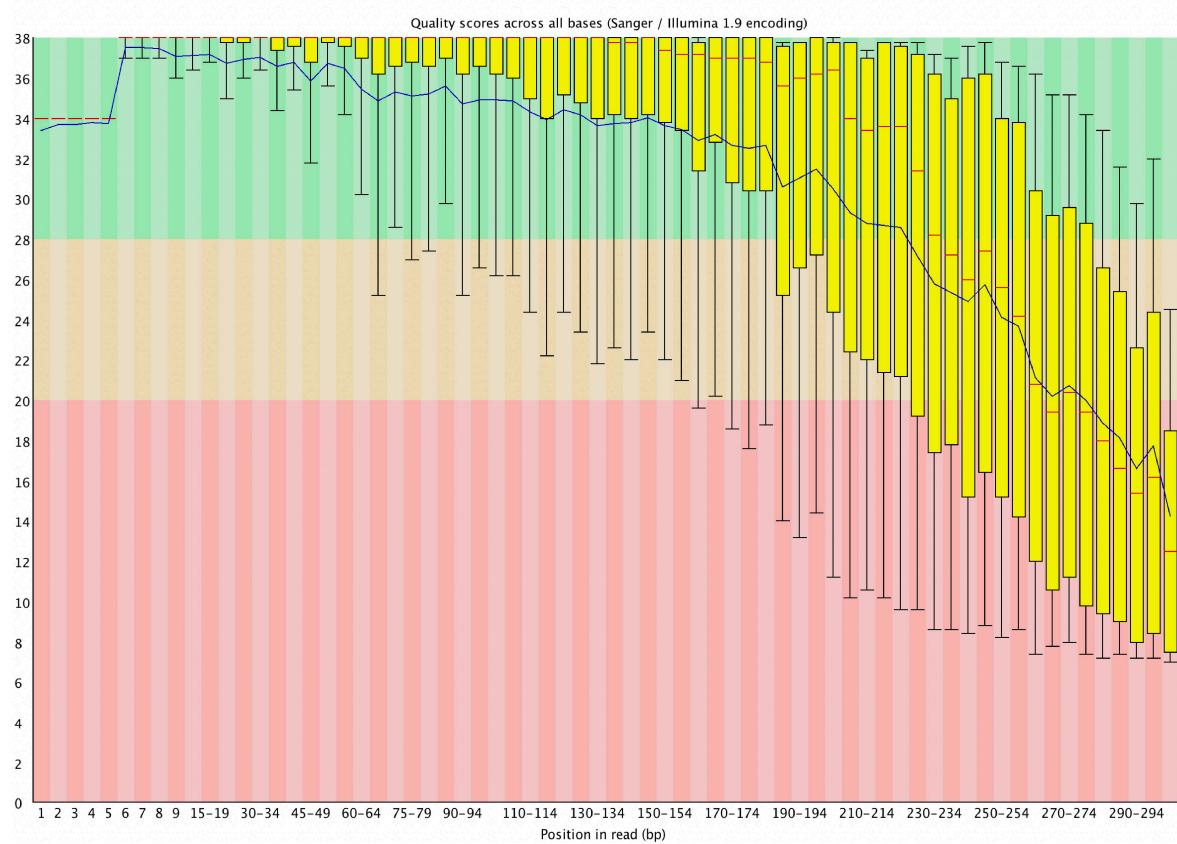

Figure S5: Sequence quality per base for R2.

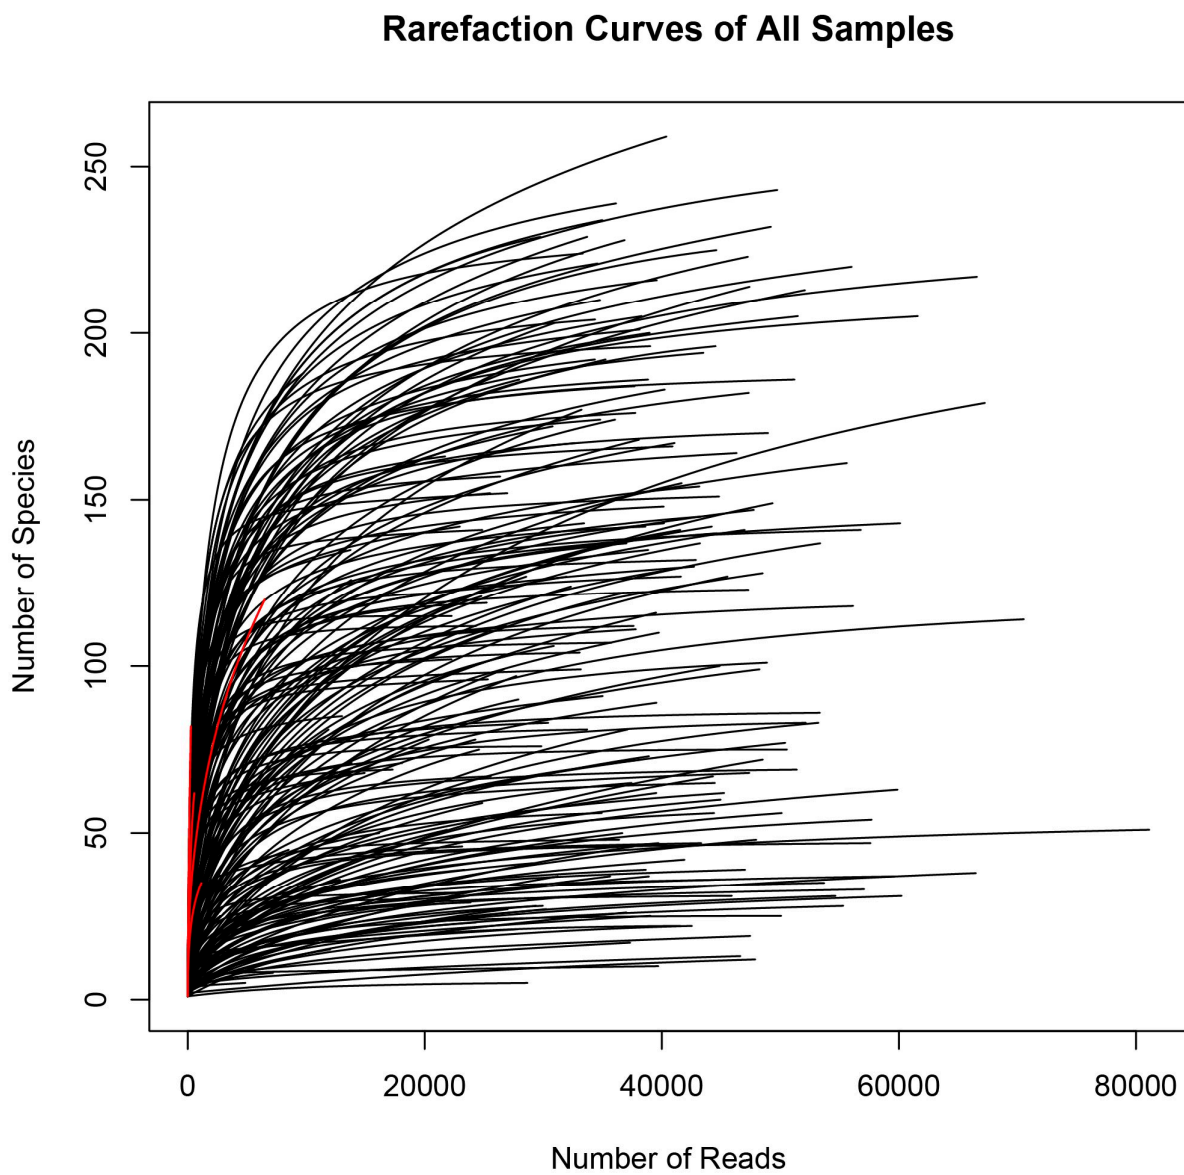

Figure S6: Rarefaction curve before removal of low-quality sequences.
